# Supplementary material for: CRISPR/Cas12a collateral cleavage activity for an ultrasensitive assay of RNase H
Source: Royal Society of Chemistry journal article supplement (doi:10.1039/d1cc06026k), 2021-12-20
Supplement: d1cc06026k1.pdf [file d1cc06026k1.pdf]

Supporting Information for

## **CRISPR/Cas12a collateral cleavage activity for an ultrasensitive assay of RNase H**

Hansol Kim, Seoyoung Lee, Jinhwan Lee, and Hyun Gyu Park\*

Department of Chemical and Biomolecular Engineering (BK 21+ program), Korea Advanced  
Institute of Science and Technology (KAIST), Daehak-ro 291, Yuseong-gu, Daejeon 34141,  
Republic of Korea

\*To whom correspondence should be addressed.

### **Correspondence:**

Hyun Gyu Park Ph.D., Department of Chemical and Biomolecular Engineering (BK21+  
Program), KAIST, 291 Daehak-ro, Yuseong-gu, Daejeon 34141, Republic of Korea, Tel.:  
+82 42-350-3932, Fax: +82 42-350-3910, E-mail: [hgpark@kaist.ac.kr](mailto:hgpark@kaist.ac.kr)

## **Contents**

|                                                                                                       |           |
|-------------------------------------------------------------------------------------------------------|-----------|
| <b>Materials and Methods .....</b>                                                                    | <b>3</b>  |
| <b>1. Materials.....</b>                                                                              | <b>3</b>  |
| <b>2. Procedures of proposed assay.....</b>                                                           | <b>4</b>  |
| <b>3. Biological sample test.....</b>                                                                 | <b>5</b>  |
| <b>4. Gel electrophoresis analysis.....</b>                                                           | <b>6</b>  |
| <b>Table S1. Oligonucleotide sequences used in this work.....</b>                                     | <b>7</b>  |
| <b>Table S2. Comparison of the proposed assay with alternative methods for RNase H<br/>assay.....</b> | <b>8</b>  |
| <b>Figure S1. Optimization of the Cas12a reaction temperature in the sensing system.....</b>          | <b>9</b>  |
| <b>Figure S2. Optimization of the ratio of RB to AD in the sensing system.....</b>                    | <b>10</b> |
| <b>Figure S3. Optimization of the Cas12a reaction time in the sensing system.....</b>                 | <b>11</b> |
| <b>Figure S4. Optimization of the chimeric duplex concentration in the sensing system....</b>         | <b>12</b> |
| <b>Reference (Supporting).....</b>                                                                    | <b>13</b> |

## Materials and Methods

### 1. Materials

All the oligonucleotides employed in this study were synthesized and purified with polyacrylamide gel electrophoresis (PAGE) by Bioneer® (Daejeon, Korea), except for blocker RNA (purified by high-performance liquid chromatography (HPLC)). The sequences of the oligonucleotides used in this study are listed in Table S1. Alt-R® A.s. Cas12a (Cpf1) Ultra and Alt-R® A.s. Cas12a crRNA were purchased from IDT (Coralville, IA, USA). *Escherichia coli* (E. coli) RNase H, DNase I, exonuclease I (Exo I), exonuclease III (Exo III), and FEN1 were purchased from Enzymomics (Daejeon, South Korea). T4 polynucleotide kinase (PNK), uracil DNA glycosylase (UDG), lambda exonuclease ( $\lambda$  exo), HIND III, Dpn I, Nt.BstI, and APE1 were purchased from New England Biolabs Inc. (Beverly, MA, USA). Ribonuclease A (RNase A) was purchased from Takara (Japan). Duplex-specific nuclease (DSN) was purchased from Evrogen (Konkov, Moscow, Russia). Dulbecco's modified Eagle's medium (DMEM) and Fetalgro Bovine Growth Serum (FBS) were purchased from Welgene Inc. (Gyeongsan-si, Korea) and RMBIO® (Missoula, MT, USA), respectively. Tumor cell lines (A549 and HT-29) were purchased from Korean Cell Line Bank (Seoul, South Korea). Ultrapure DNase/RNase-free distilled water (DW) was purchased from Bioneer Co. and used throughout all the experiments. All other chemicals were of analytical grade and used without further purification.



## **2. Procedures of proposed assay**

6  $\mu\text{L}$  of DW, 1  $\mu\text{L}$  of 10X RNase H buffer (500 mM Tris-HCl, 750 mM KCl, 30 mM  $\text{MgCl}_2$ , 100 mM DTT, pH 8.3), 1  $\mu\text{L}$  of activator DNA (AD) (100 nM), 1  $\mu\text{L}$  of blocker RNA (BR) (100 nM), and 1  $\mu\text{L}$  of RNase H at varying concentrations were mixed to make total 10  $\mu\text{L}$  of RNase H reaction solution. The RNase H reaction solution was incubated at 37 °C for 30 min. Next, the detection solution consisting of 4  $\mu\text{L}$  of DW, 2  $\mu\text{L}$  of 10X NEBuffer 2.1 (500 mM NaCl, 100 mM Tris-HCl, 100 mM  $\text{MgCl}_2$ , 1 mg  $\text{mL}^{-1}$  BSA, pH 7.9), 2  $\mu\text{L}$  of FAM- and BHQ1-labeled reporter probe (F-Q reporter) (1  $\mu\text{M}$ ), 1  $\mu\text{L}$  of crRNA (1  $\mu\text{M}$ ), and 1  $\mu\text{L}$  of Cas12a (1  $\mu\text{M}$ ) was added to the reaction mixture, which was then incubated at 25 °C for 15 min. The fluorescence signal from the reaction solution was measured from 500 nm and 600 nm at an excitation wavelength of 460 nm by using a Tecan Infinite M200 pro microplate reader (Männedorf, Switzerland) and 384-well Greiner Bio-One microplates (Ref. 781077, Courtaboeuf, France). In the experiments for the evaluation of selectivity and the assay for the tumor lysates, enzyme inactivation step was additionally conducted at 65 °C for 15 min after the RNase H reaction to eliminate the possible effect by other potentially interfering enzyme activities.

### **3. Biological sample test**

Two tumor cells (A549 and HT-29) were cultured in DMEM supplemented with 10 % FBS under humidified atmosphere containing 5 % CO<sub>2</sub> at 37 °C and collected during the exponential growth phase, which were estimated to be  $1 \times 10^7$  cells based on the cell counter, LUNA-II<sup>TM</sup> (Logos Biosystems Inc., Gyeonggi-do, Korea). Collected cells were washed three times with 1X PBS (10 mM phosphate, 138 mM NaCl, 2.7 mM KCl, pH 7.4). The cells were lysed and cellular extracts were obtained by using PRO-PREP<sup>TM</sup> protein extraction solution kit (Intron Biotechnology, South Korea). The cellular extracts were quantified by Pierce<sup>TM</sup> bicinchoninic acid (BCA) protein assay kit (Thermo Fisher Scientific, Waltham, MA, USA) and resuspended in nuclease-free water at a concentration of 2 µg/ µL. The RNase H activity was then assayed by following the same procedure as described above.

#### **4. Gel electrophoresis analysis**

For PAGE analysis, 10  $\mu$ L reaction solution was mixed with 2  $\mu$ L loading buffer (6X) purchased from Bioneer<sup>®</sup>, which was resolved on 15 % polyacrylamide gel at a constant voltage of 120 V for 120 min using 1X TBE as the running buffer. After GelRed staining, the gel image was taken with a ChemiDoc<sup>™</sup> Imaging System (Bio-Rad, Hercules, USA). In the experiments to employ FAM-labeled reporter probe, the staining step was omitted.

**Table S1.** Oligonucleotide sequences used in this work.

| Oligonucleotide                                                                                 | Sequence (5' → 3')                                                                                 |
|-------------------------------------------------------------------------------------------------|----------------------------------------------------------------------------------------------------|
| Blocker RNA (BR)                                                                                | rArCrC rUrUrC rCrUrC rCrGrC rArArU rArCrU rCrCrC rCrCrA rGrGrU                                     |
| Activator DNA (AD) <sup>(a)</sup>                                                               | ACC TGG GGG AGT ATT GCG GAG GAA GGT                                                                |
| F-Q reporter                                                                                    | [FAM]-TCG TAT CCA GTG CGA ATC ACT C-[BHQ1]                                                         |
| F reporter                                                                                      | [FAM]-AGA ACC GAA TTT GTG TAG CTT ATC AGA CTG                                                      |
| crRNA <sup>(a)</sup>                                                                            | rUrArA rUrUrU rCrUrA rCrUrC rUrUrG rUrArG rArUrU rUrCrC rGrCrA<br>rArUrA rCrUrC rCrCrC rCrArG rGrU |
| Blocker DNA (BD)                                                                                | ACC TTC CTC CGC AAT ACT CCC CCA GGT                                                                |
| <sup>(a)</sup> Sequences written in red represent complementary sequences between AD and crRNA. |                                                                                                    |

**Table S2.** Comparison of the proposed assay with alternative methods for RNase H assay.

| Key components/Methods                        | Limit of detection (U mL <sup>-1</sup> ) | Detection range (U mL <sup>-1</sup> ) | Assay time | Limitations                                                | Reference |
|-----------------------------------------------|------------------------------------------|---------------------------------------|------------|------------------------------------------------------------|-----------|
| Rolling circle amplification                  | 0.019                                    | 0-1                                   | 20 min     | • Expensive synthesis of chimeric RNA-DNA oligonucleotides | [S1]      |
| DNA templated fluorescent copper nanoclusters | 0.00055                                  | 0.0006-30                             | 1 h        |                                                            | [S2]      |
| Graphene oxide nanosheets                     | 0.0007                                   | 0.001-5                               | 3 h 15 min | • Long reaction time                                       | [S3]      |
| G-quadruplex / NMM complex                    | 0.037                                    | 0-0.7                                 | 2 h 50 min | • Long reaction time<br>• Low sensitivity                  | [S4]      |
| Target-activated DNA polymerase activity      | 0.016                                    | 0-10                                  | > 3 h      |                                                            | [S5]      |
| G-quadruplex / thioflavin T                   | 0.03                                     | 0.03-1                                | 1 h 5 min  | • Low sensitivity                                          | [S6]      |
| Tb3+-induced G-quadruplex                     | 2                                        | 0-20                                  | 40 min     |                                                            | [S7]      |
| Collateral cleavage of Cas12a                 | 0.00024                                  | 0.00025-50                            | 1 h        | -                                                          | This work |

**Figure S1.** Optimization of the Cas12a reaction temperature in the sensing system. The signal to background ratio ( $F/F_0$ , where  $F$  and  $F_0$  are the fluorescence intensities at 520 nm from the samples with and without RNase H, respectively) was obtained by comparing the fluorescence intensity of the sample with or without RNase H. The concentration of RNase H, RNP, chimeric duplex, and Cas12a reaction time were  $0.25 \text{ U mL}^{-1}$ , 50 nM, 5 nM, and 30 min, respectively. Error bars represent the standard deviation from three independent experiments.

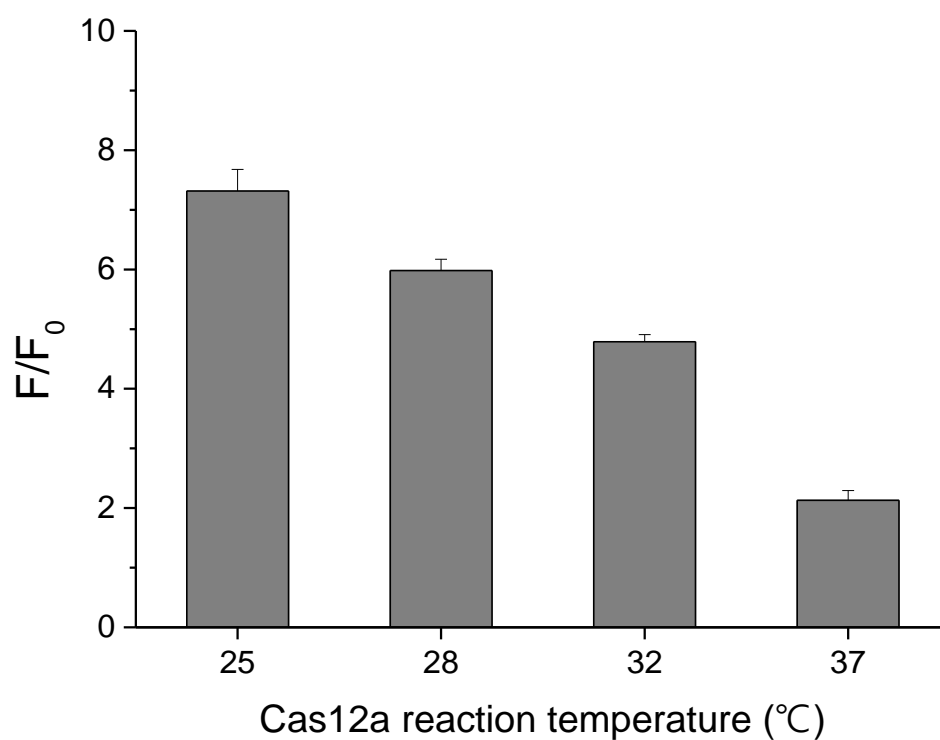

**Figure S2.** Optimization of the ratio of RB to AD in the sensing system. The signal to background ratio ( $F/F_0$ , where  $F$  and  $F_0$  are the fluorescence intensities at 520 nm from the samples with and without RNase H, respectively) was obtained by comparing the fluorescence intensity of the sample with or without RNase H. The concentration of RNase H, AD, RNP, Cas12a reaction temperature, and Cas12a reaction time were  $0.25 \text{ U mL}^{-1}$ , 5 nM, 50 nM, 25 °C, and 30 min, respectively. Error bars represent the standard deviation from three independent experiments.

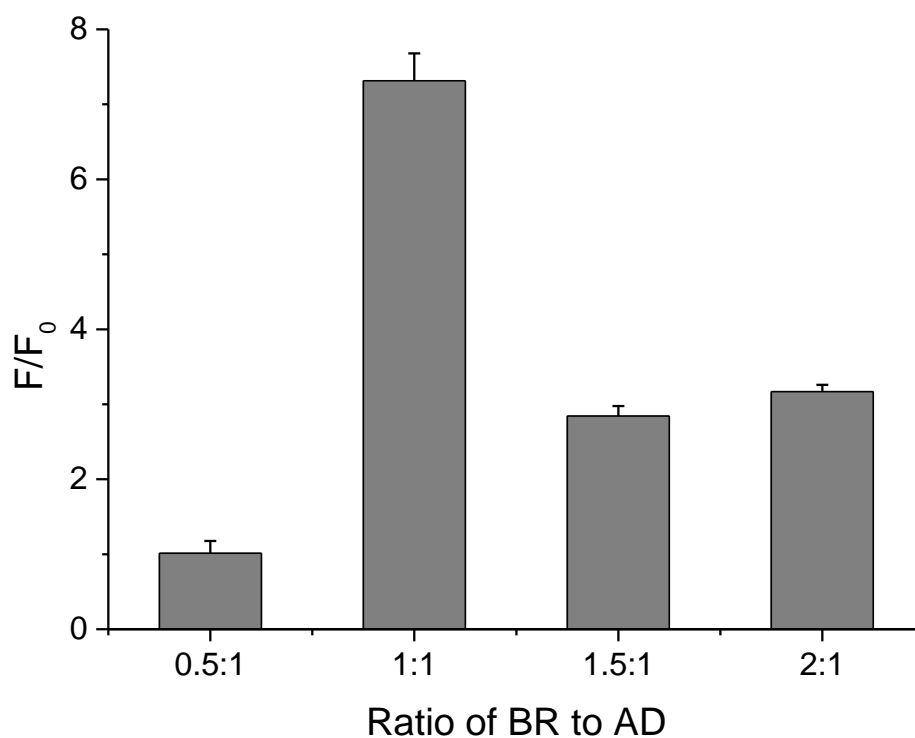

**Figure S3.** Optimization of the Cas12a reaction time in the sensing system. The signal to background ratio ( $F/F_0$ , where  $F$  and  $F_0$  are the fluorescence intensities at 520 nm from the samples with and without RNase H, respectively) was obtained by comparing the fluorescence intensity of the sample with or without RNase H. The concentration of RNase H, RNP, chimeric duplex and Cas12a reaction temperature were 0.25 U mL<sup>-1</sup>, 50 nM, 5 nM, and 25 °C, respectively. Error bars represent the standard deviation from three independent experiments.

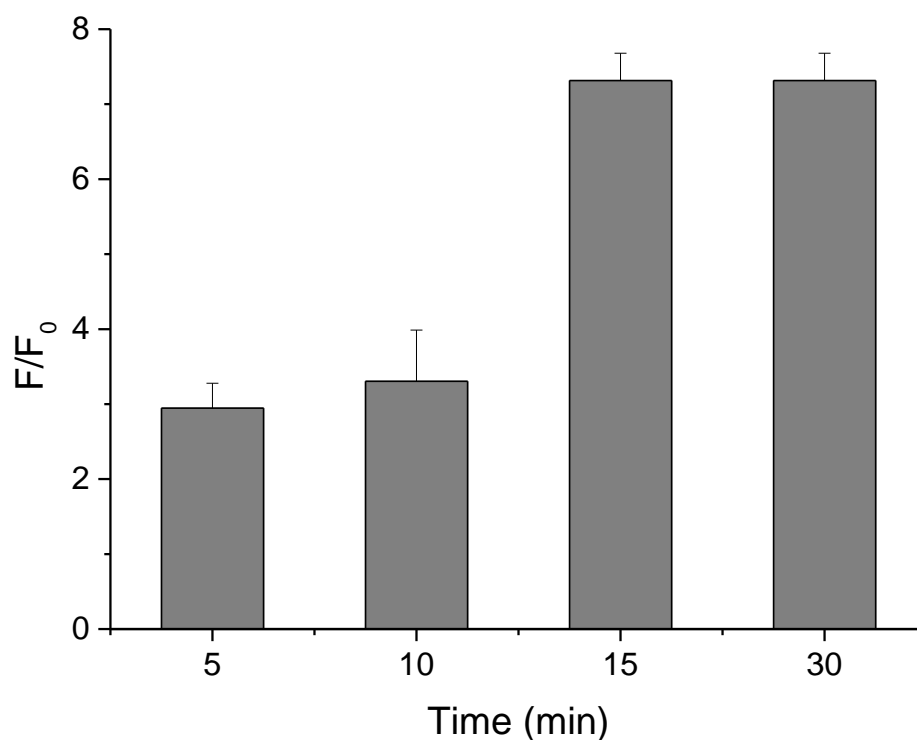

**Figure S4.** Optimization of the chimeric duplex concentration in the sensing system. The signal to background ratio ( $F/F_0$ , where  $F$  and  $F_0$  are the fluorescence intensities at 520 nm from the samples with and without RNase H, respectively) was obtained by comparing the fluorescence intensity of the sample with or without RNase H. The concentration of RNase H, RNP, Cas12a reaction temperature, and Cas12a reaction time were  $0.25 \text{ U mL}^{-1}$ ,  $50 \text{ nM}$ ,  $25 \text{ }^\circ\text{C}$ , and  $15 \text{ min}$ , respectively. Error bars represent the standard deviation from three independent experiments.

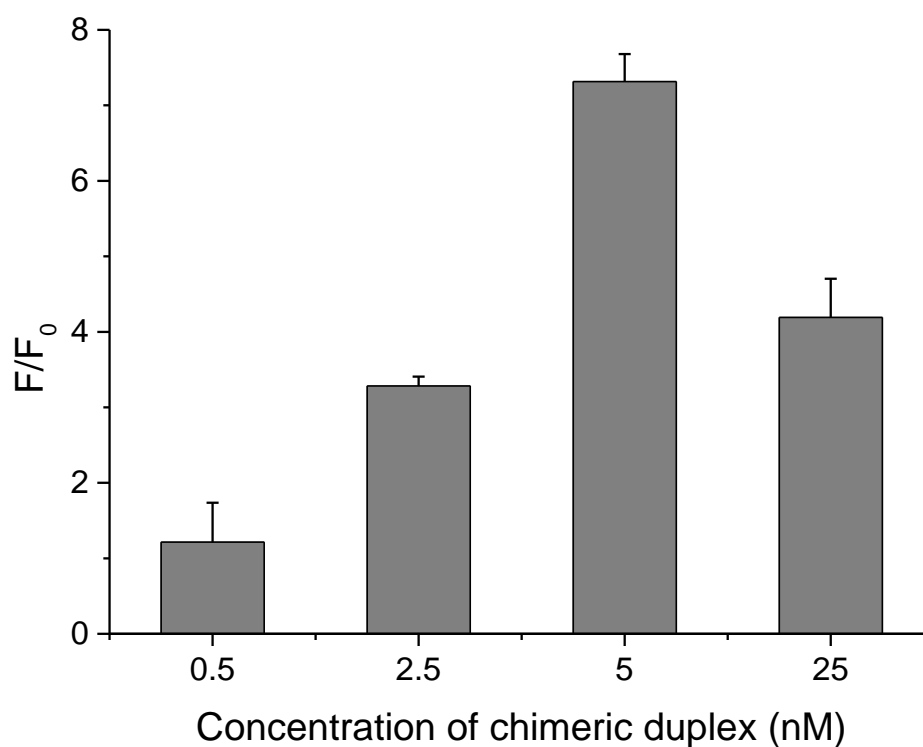

## Reference (Supporting)

- S1. Lee, C.Y., et al., Determination of RNase H activity via real-time monitoring of target-triggered rolling circle amplification. *Mikrochim Acta*, 2017. 185(1): p. 53.
- S2. Zhang, K., et al., DNA/RNA chimera-templated copper nanoclusters for label-free detection of reverse transcription-associated ribonuclease H. *Sensors and Actuators B: Chemical*, 2020. 316.
- S3. Liu, C., et al., Ribonuclease H Enzyme Activity Detection Based on Hybridization Chain Reaction Amplification and Graphene Oxide Nanosheets Fluorescence Quenching. *J Nanosci Nanotechnol*, 2020. 20(3): p. 1409-1416.
- S4. Lee, C.Y., et al., A label-free and enzyme-free signal amplification strategy for a sensitive RNase H activity assay. *Nanoscale*, 2017. 9(42): p. 16149-16153.
- S5. Jung, Y., et al., Target-Activated DNA Polymerase Activity for Sensitive RNase H Activity Assay. *Biotechnol J*, 2019. 14(7): p. e1800645.
- S6. Wu, K., et al., Label-free and nicking enzyme-assisted fluorescence signal amplification for RNase H determination based on a G-quadruplex/thioflavin T complex. *Talanta*, 2018. 182: p. 142-147.
- S7. Wu, K., et al., Label-free fluorescence assay for rapid detection of RNase H activity based on Tb<sup>3+</sup>-induced G-quadruplex conjugates. *Analytical Methods*, 2017. 9(20): p. 3055-3060.
